# Supplementary material for: Tetraalkylphosphonium polyoxometalates: electroactive, “task-specific” ionic liquids
Source: Royal Society of Chemistry journal article supplement (doi:10.1039/b614950m), 2007-01-01
Supplement: b614950m.pdf [file b614950m.pdf]

Electronic Supplementary information

**Tetraalkylphosphonium polyoxometalates:  
Electroactive, “task-specific” ionic liquids**

Paul G. Rickert,<sup>a</sup> Mark R. Antonio,<sup>\*a</sup> Millicent A. Firestone,<sup>b</sup> Karrie-Ann Kubatko,<sup>c</sup>  
Tomasz Szreder,<sup>d</sup> James F. Wishart,<sup>d</sup> and Mark L. Dietz<sup>\*a</sup>

<sup>a</sup>Chemistry Division, Argonne National Laboratory, 9700 South Cass Ave., Argonne, IL,  
60439, USA

<sup>b</sup>Materials Science Division, Argonne National Laboratory, 9700 South Cass Ave.,  
Argonne, IL, 60439, USA

<sup>c</sup>Department of Geological Sciences, University of Miami, Coral Gables, FL, 33146,  
USA

<sup>d</sup>Department of Chemistry, Brookhaven National Laboratory, Upton, NY, 11973, USA

**Crystallographic Report**

X-ray diffraction data for  $[(n\text{-C}_4\text{H}_9)_4\text{N}]_2\text{W}_6\text{O}_{19}$  were collected at 100 K using a Bruker SMART APEX diffractometer at the University of Notre Dame ( $\lambda = 0.71073 \text{ \AA}$ ). A sphere of data was collected using frame-widths of  $0.3^\circ$  in  $\omega$ . Data were corrected for Lorentz and polarization using the Bruker program SAINT, absorption corrections were performed using the Bruker program XPREP (version 5.1, 1997), and the structure was solved by direct methods and refined on the basis of  $F^2$  for all unique reflections using the Bruker SHELXTL system of programs (v. 6.10). Refinement of the structure was straightforward: 86,257 total reflections of which all 21,989 unique reflections were used in the refinement,  $71.81^\circ$  maximum 2-theta,  $R1 = 0.0272$ ,  $wR2 = 0.0669$ ,  $\text{GOF} = 1.132$ ,  $\mu = 14.57$ , cell weight = 3783.92, space group  $P\bar{1}$ , triclinic,  $a = 11.5863(3) \text{ \AA}$ ,  $b = 12.5910(4) \text{ \AA}$ ,  $c = 19.0145(6) \text{ \AA}$ ,  $\alpha = 78.832(2)^\circ$ ,  $\beta = 74.601(2)^\circ$ ,  $\gamma = 62.805(1)^\circ$ ,  $V = 2370.21(12) \text{ \AA}^3$ ,  $Z = 2$ . The unit cell and parameters as well as the individual W-O<sub>6</sub> octahedra as well as the framework -W-O-W- connectivity are in agreement with previously reported structures.<sup>1-4</sup> The crystallographic data in CIF format are available on line. Details about the crystal data and structure refinement are presented in Table S1.

---

\* Authors for correspondence. E-mail: [mantonio@anl.gov](mailto:mantonio@anl.gov); Tel: +(630) 252 9267; Fax: +(630) 252 4225; E-mail: [mdietz@anl.gov](mailto:mdietz@anl.gov); Tel: +(630) 252 3647; Fax: +(630) 252 7501

In the molecular structure of  $[(n\text{-C}_4\text{H}_9)_4\text{N}]_2\text{W}_6\text{O}_{19}$  there are two independent  $[\text{W}_6\text{O}_{19}]^{2-}$  anions lying on inversion centers as well as two independent  $n\text{-Bu}_4\text{N}^+$  cations in the asymmetric unit. These are shown in Figures S1 and S2, respectively, in which all atoms, except H, are labelled. In Figure S1, the  $\text{W}^{6+}$  ions are shown as yellow thermal ellipsoids and the  $\text{O}^{2-}$  ions are shown as red thermal ellipsoids. The oxygen atoms O1 and O11 are at the centers of each hexatungstate unit comprising atoms W1–W3, O1–O10, and W4–W6, O11–O20, respectively. The diameter of the essentially spherical Lindqvist hexatungstate cluster as measured by the 6 pairs of opposite, terminal O–O interatomic distances (O2–O2, O8–O8, O10–O10, O12–O12, O18–O18, O20–O20) is  $8.08 \pm 0.02$  Å. The interatomic distances to the neighboring atoms about the W1, W2, W3, W4, W5, and W6 sites within 0–5 Å are provided in Table S2.

In Figure S2, the two N atoms (N1 and N2) are shown as blue thermal ellipsoids and the C atoms (C1–C32) are shown as black thermal ellipsoids. The H atoms are indicated by the pink ends of the C–H stick bonds. To minimize congestion and overlap in the display, the H atom labels are not shown.

The packing diagram is shown in Figure S3, wherein all the atoms are rendered as described above, and where the unit cell is shown in blue.

Figure S1.

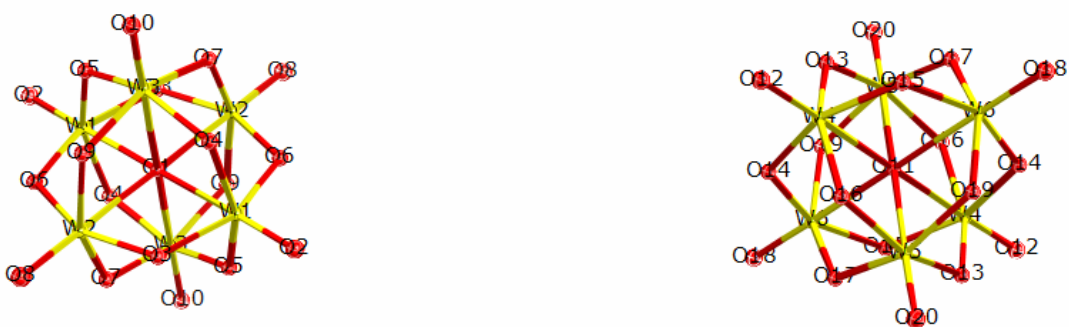

Figure S2.

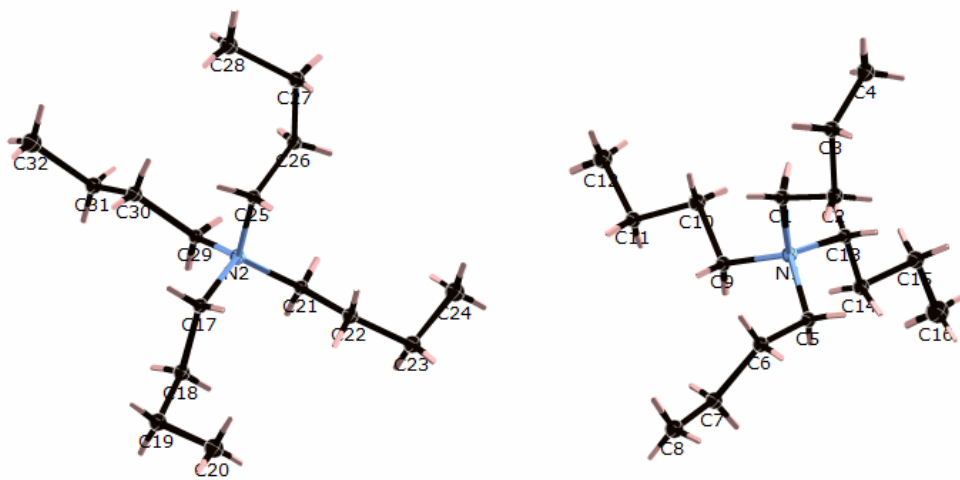

Figure S3.

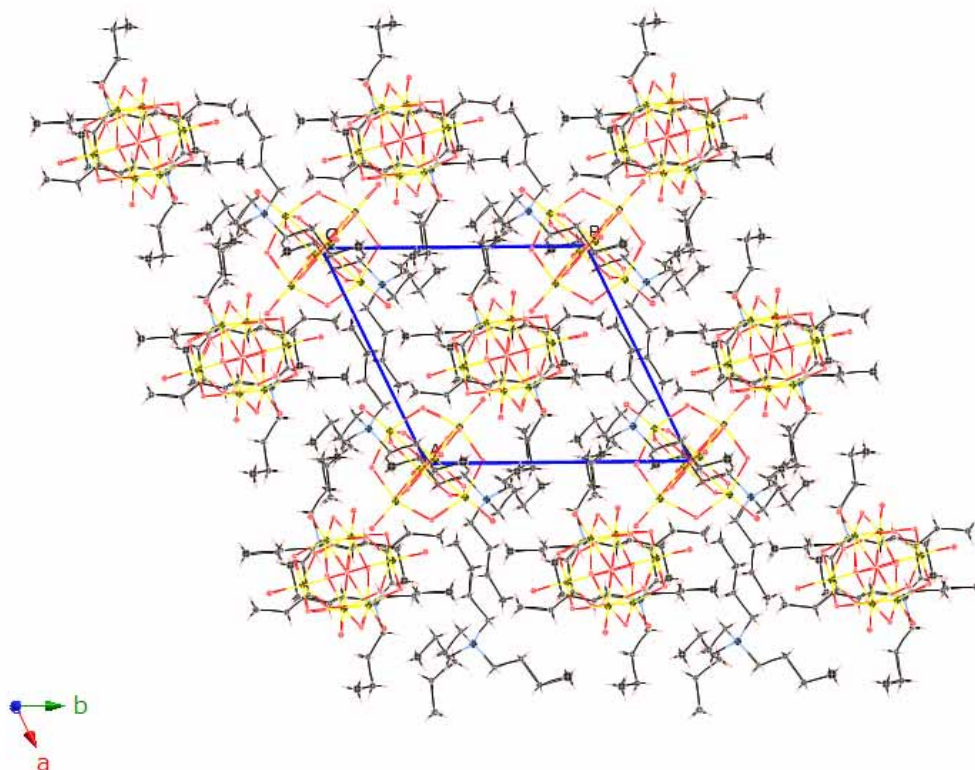

Table S1.  
Crystal data and structure refinement

| data for [( <i>n</i> -C <sub>4</sub> H <sub>9</sub> ) <sub>4</sub> N] <sub>2</sub> W <sub>6</sub> O <sub>19</sub> |                                                                                                               |
|-------------------------------------------------------------------------------------------------------------------|---------------------------------------------------------------------------------------------------------------|
| Chemical formula                                                                                                  | [( <i>n</i> -C <sub>4</sub> H <sub>9</sub> ) <sub>4</sub> N] <sub>2</sub> W <sub>6</sub> O <sub>19</sub>      |
| Formula weight                                                                                                    | 1891.96                                                                                                       |
| Temperature                                                                                                       | 100(2) K                                                                                                      |
| wavelength                                                                                                        | 0.71073 Å                                                                                                     |
| Crystal system, space group                                                                                       | triclinic, P-1                                                                                                |
| unit cell dimensions                                                                                              | a = 11.5863(3)Å    α = 78.832(2)°<br>b = 12.5910(4)Å    β = 74.601(2)°<br>c = 19.0145(6)Å    γ = 62.8050(10)° |
| Volume                                                                                                            | 2370.21(12) Å <sup>3</sup>                                                                                    |
| Z, Calculated density                                                                                             | 2, 2.651 Mg/m <sup>3</sup>                                                                                    |
| Absorption coefficient, μ                                                                                         | 14.570 mm <sup>-1</sup>                                                                                       |
| F(000)                                                                                                            | 1748                                                                                                          |
| Crystal size                                                                                                      | 0.140 x 0.110 x 0.080 mm                                                                                      |
| Theta range for data collection                                                                                   | 1.11 to 35.90°                                                                                                |
| Limiting indices                                                                                                  | -19<=h<=19, -20<=k<=20, -31<=l<=31                                                                            |
| Reflections collected / unique                                                                                    | 86257 / 21989 [R(int) = 0.0654]                                                                               |
| Refinement method                                                                                                 | Full-matrix least-squares on F <sup>2</sup>                                                                   |
| Data / restraints / parameters                                                                                    | 21989 / 72 / 751                                                                                              |
| Goodness-of-fit on F <sup>2</sup>                                                                                 | 1.132                                                                                                         |
| Final R indices [I>2σ(I)]                                                                                         | R1 = 0.0272, wR2 = 0.0641                                                                                     |
| R indices (all data)                                                                                              | R1 = 0.0320, wR2 = 0.0669                                                                                     |

Table S2.

Bond search from target site: w1:  
 ... Found 60 atoms within 0.00 - 5.00 Å of this site.

|       |      | Fractional Coordinates |        |         | Orthogonal Coordinates |         |         | Bond Distance |           |       |
|-------|------|------------------------|--------|---------|------------------------|---------|---------|---------------|-----------|-------|
| Label | Elmt | x                      | y      | z       | xor[Å]                 | yor[Å]  | zor[Å]  | d[Å]          | d/(rA+rB) |       |
| TARG. | w1   | W                      | 0.9781 | 0.0389  | 0.1187                 | -10.131 | -7.085  | 0.072         |           |       |
| 1.    | O2   | O                      | 0.9582 | 0.0677  | 0.2063                 | -11.451 | -6.383  | -0.754        | 1.7071    | 0.66  |
| 2.    | O6   | O                      | 1.1040 | 0.0971  | 0.0623                 | -10.935 | -8.246  | 1.361         | 1.9123    | 0.74  |
| 3.    | O4   | O                      | 1.1164 | -0.1211 | 0.1116                 | -9.696  | -8.629  | -0.980        | 1.9191    | 0.74  |
| 4.    | O5   | O                      | 0.8435 | 0.1823  | 0.0800                 | -9.809  | -5.856  | 1.535         | 1.9379    | 0.75  |
| 5.    | O3   | O                      | 0.8557 | -0.0319 | 0.1286                 | -8.595  | -6.231  | -0.765        | 1.9465    | 0.75  |
| 6.    | O1   | O                      | 1.0000 | 0.0000  | 0.0000                 | -8.304  | -7.993  | 1.185         | 2.3253    | 0.89  |
| 7.    | w3   | W                      | 1.1705 | -0.1880 | 0.0186                 | -8.232  | -9.728  | -0.359        | 3.2837    | 1.93  |
| 8.    | w3   | W                      | 0.8295 | 0.1880  | -0.0186                | -8.376  | -6.258  | 2.730         | 3.2913    | 1.94  |
| 9.    | w2   | W                      | 1.1544 | 0.0809  | -0.0423                | -9.749  | -9.251  | 2.526         | 3.2955    | 1.94  |
| 10.   | w2   | W                      | 0.8456 | -0.0809 | 0.0423                 | -6.858  | -6.735  | -0.155        | 3.3001    | 1.94  |
| 11.   | H3   | H                      | 0.9640 | -0.2080 | 0.2240                 | -9.185  | -7.027  | -3.196        | 3.4027    | 17.01 |
| 12.   | H44  | H                      | 1.0224 | 0.2550  | 0.1810                 | -13.372 | -6.562  | 1.143         | 3.4527    | 17.26 |
| 13.   | O7   | O                      | 1.2599 | -0.0858 | -0.0164                | -9.437  | -10.374 | 0.991         | 3.4848    | 1.34  |
| 14.   | H50  | H                      | 0.6570 | 0.2250  | 0.2020                 | -10.351 | -3.604  | 0.218         | 3.4904    | 17.45 |
| 15.   | H62  | H                      | 1.3070 | -0.0700 | 0.1390                 | -12.134 | -9.878  | -0.663        | 3.5144    | 17.57 |
| 16.   | O9   | O                      | 0.9868 | 0.2159  | -0.0483                | -9.529  | -7.604  | 3.495         | 3.5148    | 1.35  |
| 17.   | O9   | O                      | 1.0132 | -0.2160 | 0.0483                 | -7.079  | -8.382  | -1.124        | 3.5262    | 1.36  |
| 18.   | H39  | H                      | 0.8760 | 0.3520  | 0.0920                 | -11.821 | -5.625  | 2.810         | 3.5330    | 17.66 |
| 19.   | O7   | O                      | 0.7401 | 0.0858  | 0.0164                 | -7.170  | -5.612  | 1.380         | 3.5569    | 1.37  |
| 20.   | H10  | H                      | 0.7720 | -0.0380 | 0.2790                 | -9.933  | -4.771  | -2.693        | 3.6105    | 18.05 |
| 21.   | H28  | H                      | 0.9780 | -0.1080 | 0.3030                 | -11.327 | -6.465  | -3.301        | 3.6321    | 18.16 |
| 22.   | H59  | H                      | 1.2310 | -0.1910 | 0.2330                 | -11.685 | -9.070  | -2.848        | 3.8576    | 19.29 |
| 23.   | H61  | H                      | 1.2700 | -0.0180 | 0.2130                 | -13.337 | -9.055  | -1.160        | 3.9594    | 19.80 |
| 24.   | C28  | C                      | 1.3340 | -0.0876 | 0.1850                 | -12.833 | -9.891  | -1.318        | 4.1365    | 7.13  |
| 25.   | H49  | H                      | 0.7350 | 0.3470  | 0.2260                 | -12.465 | -3.793  | 1.018         | 4.1444    | 20.72 |
| 26.   | H47  | H                      | 0.6700 | 0.3890  | 0.1140                 | -10.759 | -3.768  | 2.606         | 4.2212    | 21.11 |
| 27.   | C2   | C                      | 0.9165 | -0.2585 | 0.2432                 | -8.588  | -6.671  | -3.890        | 4.2715    | 7.36  |
| 28.   | C23  | C                      | 0.6084 | 0.2689  | 0.2454                 | -10.958 | -2.873  | 0.004         | 4.2925    | 7.40  |
| 29.   | H30  | H                      | 0.8600 | 0.0600  | 0.3540                 | -12.616 | -4.827  | -2.680        | 4.3406    | 21.70 |
| 30.   | H32  | H                      | 1.0800 | 0.0150  | 0.3280                 | -13.664 | -6.837  | -2.477        | 4.3627    | 21.81 |
| 31.   | C20  | C                      | 1.0387 | 0.3244  | 0.1789                 | -14.123 | -6.529  | 1.751         | 4.3655    | 7.53  |
| 32.   | H51  | H                      | 0.6360 | 0.2260  | 0.2890                 | -11.394 | -2.968  | -0.828        | 4.3993    | 22.00 |
| 33.   | C18  | C                      | 0.8900 | 0.4227  | 0.0840                 | -12.482 | -5.602  | 3.496         | 4.4098    | 7.60  |
| 34.   | H41  | H                      | 1.0990 | 0.3370  | 0.0680                 | -13.200 | -7.574  | 3.236         | 4.4350    | 22.17 |
| 35.   | H4   | H                      | 0.8360 | -0.2380 | 0.2250                 | -7.857  | -6.074  | -3.603        | 4.4384    | 22.19 |
| 36.   | C27  | C                      | 1.3206 | -0.1984 | 0.2284                 | -12.296 | -9.830  | -2.747        | 4.4911    | 7.74  |
| 37.   | C13  | C                      | 0.9450 | -0.1193 | 0.3554                 | -11.676 | -5.949  | -4.052        | 4.5471    | 7.84  |
| 38.   | C5   | C                      | 0.7260 | -0.0571 | 0.3268                 | -10.038 | -4.195  | -3.468        | 4.5703    | 7.88  |
| 39.   | O5   | O                      | 1.1565 | -0.1823 | -0.0800                | -6.798  | -10.130 | 0.836         | 4.5795    | 1.76  |
| 40.   | O3   | O                      | 1.1443 | 0.0319  | -0.1286                | -8.012  | -9.755  | 3.136         | 4.5843    | 1.76  |
| 41.   | O6   | O                      | 0.8960 | -0.0971 | -0.0623                | -5.672  | -7.740  | 1.010         | 4.6037    | 1.77  |
| 42.   | O4   | O                      | 0.8836 | 0.1211  | -0.1116                | -6.911  | -7.357  | 3.351         | 4.6045    | 1.77  |
| 43.   | C19  | C                      | 1.0238 | 0.3889  | 0.1021                 | -13.531 | -6.660  | 3.166         | 4.6162    | 7.96  |
| 44.   | H58  | H                      | 1.3700 | -0.2960 | 0.1430                 | -10.614 | -10.927 | -2.472        | 4.6335    | 23.17 |
| 45.   | O10  | O                      | 0.7041 | 0.3273  | -0.0310                | -8.456  | -4.972  | 3.860         | 4.6498    | 1.79  |
| 46.   | C22  | C                      | 0.6401 | 0.3784  | 0.2262                 | -11.971 | -2.954  | 1.158         | 4.6498    | 8.02  |
| 47.   | w1   | W                      | 1.0219 | -0.0389 | -0.1187                | -6.476  | -8.901  | 2.299         | 4.6505    | 2.74  |
| 48.   | O8   | O                      | 0.7344 | -0.1418 | 0.0742                 | -5.812  | -5.829  | -1.159        | 4.6637    | 1.79  |
| 49.   | O10  | O                      | 1.2959 | -0.3273 | 0.0310                 | -8.151  | -11.014 | -1.489        | 4.6687    | 1.80  |
| 50.   | H7   | H                      | 1.1850 | -0.3750 | 0.1750                 | -8.788  | -9.475  | -3.711        | 4.6724    | 23.36 |
| 51.   | O8   | O                      | 1.2656 | 0.1418  | -0.0742                | -10.795 | -10.157 | 3.530         | 4.6734    | 1.80  |
| 52.   | H70  | H                      | 1.3310 | 0.1450  | 0.0890                 | -13.635 | -9.798  | 1.703         | 4.7221    | 23.61 |
| 53.   | H40  | H                      | 0.8980 | 0.4470  | 0.0327                 | -12.062 | -5.880  | 4.309         | 4.8097    | 24.05 |
| 54.   | H11  | H                      | 0.7000 | 0.0070  | 0.3550                 | -10.809 | -3.675  | -3.312        | 4.8507    | 24.25 |
| 55.   | H43  | H                      | 0.9700 | 0.3750  | 0.2160                 | -14.537 | -5.654  | 1.642         | 4.8911    | 24.46 |
| 56.   | C21  | C                      | 0.6123 | 0.4392  | 0.1517                 | -11.270 | -2.979  | 2.500         | 4.9042    | 8.46  |
| 57.   | H45  | H                      | 1.1240 | 0.3090  | 0.1860                 | -14.786 | -7.212  | 1.643         | 4.9147    | 24.57 |
| 58.   | C14  | C                      | 0.9065 | -0.0040 | 0.3881                 | -12.881 | -5.176  | -3.548        | 4.9300    | 8.50  |
| 59.   | H5   | H                      | 0.9890 | -0.3650 | 0.1617                 | -7.069  | -7.955  | -3.705        | 4.9397    | 24.70 |
| 60.   | H63  | H                      | 1.4210 | -0.0930 | 0.1780                 | -13.408 | -10.638 | -1.176        | 4.9921    | 24.96 |

Electronic Supplementary Information for Dalton Transactions  
 This journal is © The Royal Society of Chemistry 2006

Bond search from target site: w2:  
 ... Found 53 atoms within 0.00 - 5.00 Å of this site.

|       |      | Fractional Coordinates |        |        | Orthogonal Coordinates |         |        | Bond Distance |           |       |
|-------|------|------------------------|--------|--------|------------------------|---------|--------|---------------|-----------|-------|
| Label | Elmt | x                      | y      | z      | xor[Å]                 | yor[Å]  | zor[Å] | d[Å]          | d/(rA+rB) |       |
| TARG. | w2   | W                      | 0.8456 | 0.9191 | 0.0423                 | -16.144 | -4.225 | 7.969         |           |       |
| 1.    | o8   | O                      | 0.7344 | 0.8582 | 0.0742                 | -15.098 | -3.318 | 6.965         | 1.7099    | 0.66  |
| 2.    | o3   | O                      | 0.8557 | 0.9681 | 0.1286                 | -17.882 | -3.720 | 7.359         | 1.9096    | 0.73  |
| 3.    | o9   | O                      | 1.0132 | 0.7840 | 0.0483                 | -16.365 | -5.871 | 7.000         | 1.9237    | 0.74  |
| 4.    | o7   | O                      | 0.7401 | 1.0858 | 0.0164                 | -16.456 | -3.102 | 9.504         | 1.9273    | 0.74  |
| 5.    | o6   | O                      | 0.8960 | 0.9029 | -0.0623                | -14.958 | -5.229 | 9.134         | 1.9419    | 0.75  |
| 6.    | o1   | O                      | 1.0000 | 1.0000 | 0.0000                 | -17.590 | -5.482 | 9.309         | 2.3385    | 0.90  |
| 7.    | w3   | W                      | 0.8295 | 1.1880 | -0.0186                | -17.662 | -3.747 | 10.854        | 3.2943    | 1.94  |
| 8.    | w1   | W                      | 1.0219 | 0.9611 | -0.1187                | -15.762 | -6.391 | 10.423        | 3.2955    | 1.94  |
| 9.    | w3   | W                      | 1.1705 | 0.8120 | 0.0186                 | -17.518 | -7.217 | 7.765         | 3.2994    | 1.94  |
| 10.   | w1   | W                      | 0.9781 | 1.0389 | 0.1187                 | -19.418 | -4.574 | 8.196         | 3.3001    | 1.94  |
| 11.   | o4   | O                      | 1.1164 | 0.8789 | 0.1116                 | -18.982 | -6.119 | 7.144         | 3.5109    | 1.35  |
| 12.   | o5   | O                      | 0.8435 | 1.1823 | 0.0800                 | -19.095 | -3.345 | 9.659         | 3.5125    | 1.35  |
| 13.   | o5   | O                      | 1.1565 | 0.8177 | -0.0800                | -16.084 | -7.620 | 8.960         | 3.5373    | 1.36  |
| 14.   | o4   | O                      | 0.8836 | 1.1211 | -0.1116                | -16.197 | -4.846 | 11.475        | 3.5611    | 1.37  |
| 15.   | h72  | H                      | 0.4880 | 1.0900 | 0.0800                 | -15.285 | -0.735 | 8.487         | 3.6305    | 18.15 |
| 16.   | h4   | H                      | 0.8360 | 0.7620 | 0.2250                 | -17.143 | -3.563 | 4.521         | 3.6511    | 18.26 |
| 17.   | h5   | H                      | 0.9890 | 0.6350 | 0.1617                 | -16.355 | -5.444 | 4.419         | 3.7602    | 18.80 |
| 18.   | h3   | H                      | 0.9640 | 0.7920 | 0.2240                 | -18.471 | -4.517 | 4.928         | 3.8408    | 19.20 |
| 19.   | h67  | H                      | 0.6830 | 0.7210 | 0.0220                 | -12.672 | -3.531 | 6.407         | 3.8696    | 19.35 |
| 20.   | h41  | H                      | 0.9010 | 0.6630 | -0.0680                | -12.694 | -5.901 | 7.259         | 3.9015    | 19.51 |
| 21.   | h70  | H                      | 0.6690 | 0.8550 | -0.0890                | -12.258 | -3.678 | 8.792         | 4.0090    | 20.05 |
| 22.   | h62  | H                      | 0.6930 | 1.0700 | -0.1390                | -13.760 | -3.598 | 11.158        | 4.0306    | 20.15 |
| 23.   | c2   | C                      | 0.9165 | 0.7415 | 0.2432                 | -17.874 | -4.161 | 4.234         | 4.1170    | 7.10  |
| 24.   | h39  | H                      | 1.1240 | 0.6480 | -0.0920                | -14.073 | -7.850 | 7.685         | 4.1852    | 20.93 |
| 25.   | h38  | H                      | 0.7880 | 0.6000 | 0.1110                 | -13.657 | -4.197 | 4.496         | 4.2722    | 21.36 |
| 26.   | h10  | H                      | 0.7720 | 0.9620 | 0.2790                 | -19.219 | -2.260 | 5.431         | 4.4453    | 22.23 |
| 27.   | h40  | H                      | 1.1020 | 0.5530 | -0.0327                | -13.832 | -7.595 | 6.186         | 4.4597    | 22.30 |
| 28.   | c3   | C                      | 1.0021 | 0.6188 | 0.2118                 | -17.010 | -5.321 | 3.710         | 4.4825    | 7.73  |
| 29.   | c32  | C                      | 0.4074 | 1.1523 | 0.1003                 | -15.477 | 0.174  | 8.658         | 4.5020    | 7.76  |
| 30.   | h68  | H                      | 0.4810 | 1.2770 | 0.0690                 | -16.811 | -0.269 | 10.128        | 4.5557    | 22.78 |
| 31.   | o6   | O                      | 1.1040 | 1.0971 | 0.0623                 | -20.221 | -5.736 | 9.485         | 4.6047    | 1.77  |
| 32.   | o7   | O                      | 1.2599 | 0.9142 | -0.0164                | -18.724 | -7.863 | 9.115         | 4.6048    | 1.77  |
| 33.   | o9   | O                      | 0.9868 | 1.2160 | -0.0483                | -18.815 | -5.093 | 11.619        | 4.6054    | 1.77  |
| 34.   | o3   | O                      | 1.1443 | 1.0319 | -0.1286                | -17.298 | -7.245 | 11.260        | 4.6132    | 1.77  |
| 35.   | c19  | C                      | 0.9762 | 0.6111 | -0.1021                | -12.362 | -6.816 | 7.329         | 4.6284    | 7.98  |
| 36.   | o2   | O                      | 0.9582 | 1.0677 | 0.2063                 | -20.737 | -3.873 | 7.370         | 4.6455    | 1.79  |
| 37.   | h12  | H                      | 0.5860 | 0.9520 | 0.2770                 | -17.554 | -0.810 | 5.153         | 4.6460    | 23.23 |
| 38.   | h71  | H                      | 0.4060 | 1.1420 | 0.1490                 | -16.046 | 0.420  | 7.997         | 4.6460    | 23.23 |
| 39.   | c18  | C                      | 1.1100 | 0.5773 | -0.0840                | -13.411 | -7.873 | 6.999         | 4.6605    | 8.04  |
| 40.   | o10  | O                      | 1.2959 | 0.6727 | 0.0310                 | -17.438 | -8.503 | 6.635         | 4.6649    | 1.79  |
| 41.   | o10  | O                      | 0.7041 | 1.3273 | -0.0310                | -17.742 | -2.461 | 11.984        | 4.6667    | 1.79  |
| 42.   | o2   | O                      | 1.0418 | 0.9323 | -0.2063                | -14.442 | -7.092 | 11.249        | 4.6767    | 1.80  |
| 43.   | w2   | W                      | 1.1544 | 1.0809 | -0.0423                | -19.036 | -6.740 | 10.650        | 4.6769    | 2.75  |
| 44.   | h50  | H                      | 0.6570 | 1.2250 | 0.2020                 | -19.637 | -1.093 | 8.342         | 4.7058    | 23.53 |
| 45.   | h44  | H                      | 0.9776 | 0.7450 | -0.1810                | -12.521 | -6.913 | 9.352         | 4.7184    | 23.59 |
| 46.   | h66  | H                      | 0.4740 | 1.2350 | -0.0420                | -14.821 | -0.913 | 11.092        | 4.7398    | 23.70 |
| 47.   | c30  | C                      | 0.6078 | 0.7097 | 0.0156                 | -11.854 | -2.993 | 6.301         | 4.7646    | 8.21  |
| 48.   | h56  | H                      | 0.5770 | 0.7120 | 0.1540                 | -13.542 | -1.999 | 4.647         | 4.7706    | 23.85 |
| 49.   | h7   | H                      | 1.1850 | 0.6250 | 0.1750                 | -18.075 | -6.965 | 4.413         | 4.8875    | 24.44 |
| 50.   | h66  | H                      | 0.5260 | 0.7650 | 0.0420                 | -12.055 | -2.059 | 6.342         | 4.9050    | 24.53 |
| 51.   | c32  | C                      | 0.5926 | 0.8477 | -0.1003                | -11.399 | -3.146 | 8.775         | 4.9320    | 8.50  |
| 52.   | h63  | H                      | 0.4210 | 0.9070 | 0.1780                 | -14.391 | -0.134 | 5.762         | 4.9674    | 24.84 |
| 53.   | c28  | C                      | 0.6660 | 1.0876 | -0.1850                | -13.060 | -3.584 | 11.813        | 4.9695    | 8.57  |

Electronic Supplementary Information for Dalton Transactions  
 This journal is © The Royal Society of Chemistry 2006

Bond search from target site: W3:  
 ... Found 57 atoms within 0.00 - 5.00 Å of this site.

|       |      | Fractional Coordinates |        |         | Orthogonal Coordinates |         |        | Bond Distance |           |       |
|-------|------|------------------------|--------|---------|------------------------|---------|--------|---------------|-----------|-------|
| Label | Elmt | x                      | y      | z       | xor[Å]                 | yor[Å]  | zor[Å] | d[Å]          | d/(rA+rB) |       |
| TARG. | W3   | W                      | 0.8295 | 0.1880  | 0.9814                 | -22.267 | -0.900 | -9.097        |           |       |
| 1.    | O10  | O                      | 0.7041 | 0.3273  | 0.9690                 | -22.347 | 0.386  | -7.967        | 1.7137    | 0.66  |
| 2.    | O5   | O                      | 0.8435 | 0.1823  | 1.0800                 | -23.700 | -0.497 | -10.292       | 1.9091    | 0.73  |
| 3.    | O7   | O                      | 0.7401 | 0.0858  | 1.0164                 | -21.061 | -0.254 | -10.446       | 1.9215    | 0.74  |
| 4.    | O9   | O                      | 0.9868 | 0.2159  | 0.9517                 | -23.420 | -2.246 | -8.331        | 1.9306    | 0.74  |
| 5.    | O4   | O                      | 0.8836 | 0.1211  | 0.8884                 | -20.802 | -1.998 | -8.475        | 1.9335    | 0.74  |
| 6.    | O1   | O                      | 1.0000 | 0.0000  | 1.0000                 | -22.195 | -2.635 | -10.641       | 2.3240    | 0.89  |
| 7.    | W1   | W                      | 1.0219 | -0.0389 | 0.8813                 | -20.367 | -3.543 | -9.527        | 3.2837    | 1.93  |
| 8.    | W1   | W                      | 0.9781 | 0.0389  | 1.1187                 | -24.023 | -1.726 | -11.755       | 3.2913    | 1.94  |
| 9.    | W2   | W                      | 0.8456 | -0.0809 | 1.0423                 | -20.749 | -1.377 | -11.981       | 3.2943    | 1.94  |
| 10.   | W2   | W                      | 1.1544 | 0.0809  | 0.9577                 | -23.641 | -3.893 | -9.301        | 3.2994    | 1.94  |
| 11.   | H58  | H                      | 0.6300 | 0.2960  | 0.8570                 | -19.885 | 0.300  | -6.984        | 3.4024    | 17.01 |
| 12.   | H7   | H                      | 0.8150 | 0.3750  | 0.8250                 | -21.710 | -1.152 | -5.744        | 3.4077    | 17.04 |
| 13.   | H47  | H                      | 0.6700 | 0.3890  | 1.1140                 | -24.651 | 1.590  | -9.220        | 3.4494    | 17.25 |
| 14.   | O3   | O                      | 0.8557 | -0.0319 | 1.1286                 | -22.487 | -0.872 | -12.592       | 3.5021    | 1.35  |
| 15.   | H39  | H                      | 0.8760 | 0.3520  | 1.0920                 | -25.712 | -0.267 | -9.017        | 3.5036    | 17.52 |
| 16.   | O6   | O                      | 1.1040 | 0.0971  | 1.0623                 | -24.826 | -2.888 | -10.466       | 3.5184    | 1.35  |
| 17.   | O6   | O                      | 0.8960 | -0.0971 | 0.9377                 | -19.564 | -2.381 | -10.816       | 3.5299    | 1.36  |
| 18.   | O3   | O                      | 1.1443 | 0.0319  | 0.8714                 | -21.903 | -4.397 | -8.691        | 3.5395    | 1.36  |
| 19.   | H68  | H                      | 0.4810 | 0.2770  | 1.0690                 | -21.416 | 2.579  | -9.822        | 3.6538    | 18.27 |
| 20.   | H64  | H                      | 0.6740 | 0.5230  | 1.0210                 | -24.636 | 1.397  | -7.027        | 3.8948    | 19.47 |
| 21.   | H62  | H                      | 0.6930 | 0.0700  | 0.8610                 | -18.365 | -0.750 | -8.793        | 3.9168    | 19.58 |
| 22.   | H65  | H                      | 0.4710 | 0.4160  | 0.9490                 | -20.957 | 2.365  | -7.286        | 3.9563    | 19.78 |
| 23.   | H5   | H                      | 1.0110 | 0.3650  | 0.8383                 | -23.430 | -2.673 | -5.751        | 3.9613    | 19.81 |
| 24.   | H66  | H                      | 0.4740 | 0.2350  | 0.9580                 | -19.426 | 1.935  | -8.859        | 4.0199    | 20.10 |
| 25.   | H40  | H                      | 0.8980 | 0.4470  | 1.0327                 | -25.953 | -0.522 | -7.517        | 4.0280    | 20.14 |
| 26.   | H3   | H                      | 1.0360 | 0.2080  | 0.7760                 | -21.314 | -3.601 | -6.260        | 4.0315    | 20.16 |
| 27.   | H50  | H                      | 0.6570 | 0.2250  | 1.2020                 | -24.242 | 1.754  | -11.609       | 4.1540    | 20.77 |
| 28.   | C18  | C                      | 0.8900 | 0.4227  | 1.0840                 | -26.374 | -0.244 | -8.331        | 4.2286    | 7.29  |
| 29.   | C4   | C                      | 0.8509 | 0.4253  | 0.7908                 | -22.000 | -1.496 | -4.889        | 4.2585    | 7.34  |
| 30.   | H59  | H                      | 0.7690 | 0.1910  | 0.7670                 | -18.814 | -1.557 | -6.608        | 4.3072    | 21.54 |
| 31.   | C26  | C                      | 0.5982 | 0.3133  | 0.8118                 | -19.154 | 0.355  | -6.347        | 4.3395    | 7.48  |
| 32.   | C21  | C                      | 0.6123 | 0.4392  | 1.1517                 | -25.162 | 2.380  | -9.327        | 4.3801    | 7.55  |
| 33.   | C31  | C                      | 0.4023 | 0.2732  | 1.0643                 | -20.662 | 3.173  | -9.890        | 4.4490    | 7.67  |
| 34.   | C3   | C                      | 0.9979 | 0.3812  | 0.7882                 | -22.775 | -2.796 | -5.042        | 4.5050    | 7.77  |
| 35.   | H72  | H                      | 0.4880 | 0.0900  | 1.0800                 | -19.891 | 2.112  | -11.463       | 4.5077    | 22.54 |
| 36.   | H8   | H                      | 0.7950 | 0.5010  | 0.8080                 | -22.478 | -0.767 | -4.543        | 4.5601    | 22.80 |
| 37.   | O9   | O                      | 1.0132 | -0.2160 | 1.0483                 | -20.970 | -3.024 | -12.951       | 4.5879    | 1.77  |
| 38.   | O5   | O                      | 1.1565 | -0.1823 | 0.9200                 | -20.690 | -4.772 | -10.991       | 4.5903    | 1.77  |
| 39.   | O7   | O                      | 1.2599 | -0.0858 | 0.9836                 | -23.329 | -5.015 | -10.836       | 4.5925    | 1.77  |
| 40.   | H57  | H                      | 0.6260 | 0.3750  | 0.7860                 | -19.599 | 0.149  | -5.507        | 4.5939    | 22.97 |
| 41.   | O4   | O                      | 1.1164 | -0.1211 | 1.1116                 | -23.588 | -3.271 | -12.807       | 4.5972    | 1.77  |
| 42.   | C30  | C                      | 0.3922 | 0.2903  | 0.9844                 | -19.627 | 2.869  | -8.819        | 4.6094    | 7.95  |
| 43.   | W3   | W                      | 1.1705 | -0.1880 | 1.0186                 | -22.123 | -4.370 | -12.186       | 4.6480    | 2.73  |
| 44.   | O2   | O                      | 0.9582 | 0.0677  | 1.2063                 | -25.342 | -1.025 | -12.581       | 4.6488    | 1.79  |
| 45.   | O8   | O                      | 1.2656 | 0.1418  | 0.9258                 | -24.687 | -4.799 | -8.297        | 4.6584    | 1.79  |
| 46.   | O2   | O                      | 1.0418 | -0.0677 | 0.7937                 | -19.048 | -4.244 | -8.702        | 4.6590    | 1.79  |
| 47.   | O8   | O                      | 0.7344 | -0.1418 | 1.0742                 | -19.703 | -0.470 | -12.985       | 4.6774    | 1.80  |
| 48.   | C2   | C                      | 1.0835 | 0.2585  | 0.7568                 | -21.910 | -3.956 | -5.566        | 4.6836    | 8.08  |
| 49.   | C28  | C                      | 0.6660 | 0.0876  | 0.8150                 | -17.665 | -0.736 | -8.138        | 4.7036    | 8.11  |
| 50.   | C29  | C                      | 0.3885 | 0.4120  | 0.9507                 | -20.259 | 3.023  | -7.437        | 4.7095    | 8.12  |
| 51.   | H46  | H                      | 0.5200 | 0.4650  | 1.1510                 | -24.625 | 3.178  | -9.218        | 4.7123    | 23.56 |
| 52.   | C27  | C                      | 0.6794 | 0.1984  | 0.7716                 | -18.202 | -0.798 | -6.708        | 4.7155    | 8.13  |
| 53.   | C29  | C                      | 0.6115 | 0.5880  | 1.0493                 | -25.113 | 2.211  | -6.907        | 4.7508    | 8.19  |
| 54.   | H65  | H                      | 0.5290 | 0.5840  | 1.0510                 | -24.416 | 2.869  | -7.058        | 4.7935    | 23.97 |
| 55.   | H9   | H                      | 0.8430 | 0.4180  | 0.7450                 | -21.231 | -1.697 | -4.416        | 4.8602    | 24.30 |
| 56.   | H4   | H                      | 1.1640 | 0.2380  | 0.7750                 | -22.641 | -4.554 | -5.852        | 4.9008    | 24.50 |
| 57.   | C32  | C                      | 0.4074 | 0.1523  | 1.1003                 | -20.082 | 3.022  | -11.293       | 4.9974    | 8.62  |



Electronic Supplementary Information for Dalton Transactions  
 This journal is © The Royal Society of Chemistry 2006

Bond search from target site: W4:  
 ... Found 58 atoms within 0.00 - 5.00 Å of this site.

| Label |     | Elmt | Fractional Coordinates |        |        | Orthogonal Coordinates |        |        | Bond Distance |           |
|-------|-----|------|------------------------|--------|--------|------------------------|--------|--------|---------------|-----------|
|       |     |      | x                      | y      | z      | xor[Å]                 | yor[Å] | zor[Å] | d[Å]          | d/(rA+rB) |
| TARG. | W4  | W    | 0.4454                 | 0.6917 | 0.5280 | -17.455                | 1.006  | -0.097 |               |           |
| 1.    | O12 | O    | 0.4079                 | 0.8319 | 0.5490 | -18.739                | 1.770  | 0.748  | 1.7166        | 0.66      |
| 2.    | O15 | O    | 0.3232                 | 0.7182 | 0.4679 | -15.853                | 1.727  | 0.683  | 1.9223        | 0.74      |
| 3.    | O16 | O    | 0.5785                 | 0.6701 | 0.4393 | -17.129                | -0.587 | 0.934  | 1.9253        | 0.74      |
| 4.    | O13 | O    | 0.3350                 | 0.6373 | 0.6064 | -17.123                | 2.172  | -1.597 | 1.9287        | 0.74      |
| 5.    | O14 | O    | 0.5892                 | 0.5882 | 0.5775 | -18.377                | -0.138 | -1.352 | 1.9325        | 0.74      |
| 6.    | O11 | O    | 0.5000                 | 0.5000 | 0.5000 | -15.741                | -0.062 | -1.259 | 2.3305        | 0.90      |
| 7.    | W5  | W    | 0.3494                 | 0.4796 | 0.6041 | -15.746                | 1.649  | -2.834 | 3.2902        | 1.94      |
| 8.    | W5  | W    | 0.6506                 | 0.5204 | 0.3959 | -15.735                | -1.773 | 0.316  | 3.2939        | 1.94      |
| 9.    | W6  | W    | 0.3331                 | 0.5803 | 0.4324 | -14.162                | 1.112  | -0.005 | 3.2962        | 1.94      |
| 10.   | W6  | W    | 0.6669                 | 0.4197 | 0.5676 | -17.319                | -1.236 | -2.512 | 3.2985        | 1.94      |
| 11.   | H18 | H    | 0.3930                 | 0.8760 | 0.3730 | -16.579                | 1.057  | 3.171  | 3.3835        | 16.92     |
| 12.   | O19 | O    | 0.4875                 | 0.5825 | 0.3621 | -14.487                | -0.494 | 1.028  | 3.5108        | 1.35      |
| 13.   | O17 | O    | 0.2457                 | 0.5480 | 0.5291 | -14.479                | 2.247  | -1.514 | 3.5229        | 1.35      |
| 14.   | O17 | O    | 0.7543                 | 0.4520 | 0.4709 | -17.003                | -2.371 | -1.003 | 3.5255        | 1.36      |
| 15.   | O19 | O    | 0.5125                 | 0.4175 | 0.6379 | -16.994                | 0.370  | -3.545 | 3.5365        | 1.36      |
| 16.   | H51 | H    | 0.3640                 | 0.7740 | 0.7110 | -20.087                | 2.844  | -1.689 | 3.5830        | 17.92     |
| 17.   | H23 | H    | 0.7240                 | 0.7030 | 0.5710 | -20.472                | -0.962 | -0.184 | 3.6029        | 18.01     |
| 18.   | H15 | H    | 0.5080                 | 0.9420 | 0.4300 | -18.939                | 0.609  | 3.170  | 3.6093        | 18.05     |
| 19.   | H20 | H    | 0.7030                 | 0.8030 | 0.4460 | -19.490                | -1.213 | 2.082  | 3.7162        | 18.58     |
| 20.   | H34 | H    | 0.0600                 | 0.8550 | 0.5482 | -16.053                | 4.604  | 0.534  | 3.9133        | 19.57     |
| 21.   | H30 | H    | 0.1400                 | 0.9400 | 0.6460 | -18.865                | 4.702  | 0.162  | 3.9649        | 19.82     |
| 22.   | H17 | H    | 0.2870                 | 1.0000 | 0.4070 | -17.323                | 2.397  | 3.651  | 3.9996        | 20.00     |
| 23.   | C8  | C    | 0.3679                 | 0.9633 | 0.3715 | -17.161                | 1.468  | 3.868  | 4.0027        | 6.90      |
| 24.   | H48 | H    | 0.4020                 | 0.5650 | 0.7390 | -18.850                | 2.165  | -3.673 | 4.0104        | 20.05     |
| 25.   | H52 | H    | 0.5890                 | 0.6420 | 0.7080 | -20.688                | 0.698  | -2.459 | 4.0157        | 20.08     |
| 26.   | H35 | H    | 0.0590                 | 0.7990 | 0.6320 | -16.689                | 4.921  | -0.913 | 4.0721        | 20.36     |
| 27.   | H31 | H    | 0.1240                 | 1.0130 | 0.5608 | -18.227                | 4.557  | 1.744  | 4.0737        | 20.37     |
| 28.   | H11 | H    | 0.3000                 | 0.9930 | 0.6450 | -20.672                | 3.551  | 0.795  | 4.1978        | 20.99     |
| 29.   | C7  | C    | 0.4850                 | 0.9776 | 0.3825 | -18.419                | 0.627  | 3.993  | 4.2188        | 7.27      |
| 30.   | C23 | C    | 0.3916                 | 0.7311 | 0.7546 | -20.523                | 2.749  | -2.521 | 4.2809        | 7.38      |
| 31.   | C14 | C    | 0.0935                 | 1.0040 | 0.6119 | -18.600                | 5.052  | 1.031  | 4.3534        | 7.51      |
| 32.   | H13 | H    | 0.6360                 | 0.8370 | 0.3300 | -17.638                | -1.214 | 3.651  | 4.3594        | 21.80     |
| 33.   | C16 | C    | 0.0086                 | 0.8610 | 0.5962 | -16.349                | 5.288  | -0.046 | 4.4227        | 7.63      |
| 34.   | H14 | H    | 0.5320                 | 0.9390 | 0.6250 | -21.819                | 1.454  | 0.867  | 4.4916        | 22.46     |
| 35.   | C22 | C    | 0.3599                 | 0.6216 | 0.7738 | -19.510                | 2.830  | -3.675 | 4.5123        | 7.78      |
| 36.   | C24 | C    | 0.5380                 | 0.7003 | 0.7437 | -21.301                | 1.443  | -2.469 | 4.5397        | 7.83      |
| 37.   | C11 | C    | 0.8044                 | 0.7132 | 0.5670 | -21.179                | -1.601 | 0.042  | 4.5474        | 7.84      |
| 38.   | O14 | O    | 0.4108                 | 0.4118 | 0.4225 | -13.104                | 0.014  | -1.165 | 4.5887        | 1.76      |
| 39.   | O15 | O    | 0.6768                 | 0.2818 | 0.5321 | -15.628                | -1.851 | -3.201 | 4.5975        | 1.77      |
| 40.   | O13 | O    | 0.6650                 | 0.3627 | 0.3936 | -14.358                | -2.296 | -0.920 | 4.6015        | 1.77      |
| 41.   | O16 | O    | 0.4215                 | 0.3299 | 0.5607 | -14.352                | 0.463  | -3.451 | 4.6022        | 1.77      |
| 42.   | C9  | C    | 0.7766                 | 0.8200 | 0.4434 | -20.223                | -1.773 | 2.338  | 4.6159        | 7.96      |
| 43.   | H49 | H    | 0.2650                 | 0.6530 | 0.7740 | -19.016                | 3.669  | -3.535 | 4.6204        | 23.10     |
| 44.   | O18 | O    | 0.7876                 | 0.3624 | 0.6180 | -18.490                | -2.074 | -3.431 | 4.6554        | 1.79      |
| 45.   | W4  | W    | 0.5546                 | 0.3083 | 0.4720 | -14.026                | -1.130 | -2.421 | 4.6609        | 2.74      |
| 46.   | O20 | O    | 0.2405                 | 0.4632 | 0.6820 | -15.772                | 2.895  | -4.018 | 4.6666        | 1.79      |
| 47.   | H19 | H    | 0.2640                 | 1.1070 | 0.5320 | -19.862                | 3.520  | 3.014  | 4.6680        | 23.34     |
| 48.   | O20 | O    | 0.7595                 | 0.5368 | 0.3180 | -15.709                | -3.019 | 1.501  | 4.6692        | 1.80      |
| 49.   | O18 | O    | 0.2124                 | 0.6376 | 0.3820 | -12.991                | 1.950  | 0.914  | 4.6733        | 1.80      |
| 50.   | H53 | H    | 0.5550                 | 0.7700 | 0.7320 | -21.927                | 1.419  | -1.744 | 4.7836        | 23.92     |
| 51.   | H33 | H    | 0.0850                 | 0.9570 | 0.4090 | -15.274                | 3.915  | 3.038  | 4.8008        | 24.00     |
| 52.   | C6  | C    | 0.6094                 | 0.9182 | 0.3246 | -18.096                | -0.826 | 4.343  | 4.8452        | 8.35      |
| 53.   | H19 | H    | 0.7360                 | 0.8930 | 0.4680 | -20.905                | -1.133 | 2.592  | 4.8689        | 24.34     |
| 54.   | H16 | H    | 0.3550                 | 0.9970 | 0.3219 | -16.678                | 1.390  | 4.713  | 4.8877        | 24.44     |
| 55.   | H21 | H    | 0.9050                 | 0.6450 | 0.4680 | -20.006                | -3.107 | 0.778  | 4.9173        | 24.59     |
| 56.   | H1  | H    | 0.8440                 | 0.6810 | 0.3450 | -18.125                | -3.188 | 2.453  | 4.9531        | 24.77     |
| 57.   | H24 | H    | 0.7770                 | 0.7870 | 0.5880 | -21.928                | -1.084 | 0.361  | 4.9581        | 24.79     |
| 58.   | C10 | C    | 0.8733                 | 0.7209 | 0.4873 | -20.715                | -2.559 | 1.129  | 4.9837        | 8.59      |

Electronic Supplementary Information for Dalton Transactions  
 This journal is © The Royal Society of Chemistry 2006

Bond search from target site: W5:  
 ... Found 56 atoms within 0.00 - 5.00 Å of this site.

|       |      | Fractional Coordinates |        |        | Orthogonal Coordinates |         |        | Bond Distance |           |       |
|-------|------|------------------------|--------|--------|------------------------|---------|--------|---------------|-----------|-------|
| Label | Elmt | x                      | y      | z      | xor[Å]                 | yor[Å]  | zor[Å] | d[Å]          | d/(rA+rB) |       |
| TARG. | W5   | W                      | 0.6506 | 0.5204 | 0.3959                 | -15.735 | -1.773 | 0.316         |           |       |
| 1.    | O20  | O                      | 0.7595 | 0.5368 | 0.3180                 | -15.709 | -3.019 | 1.501         | 1.7195    | 0.66  |
| 2.    | O19  | O                      | 0.4875 | 0.5825 | 0.3621                 | -14.487 | -0.494 | 1.028         | 1.9232    | 0.74  |
| 3.    | O13  | O                      | 0.6650 | 0.3627 | 0.3936                 | -14.358 | -2.296 | -0.920        | 1.9235    | 0.74  |
| 4.    | O17  | O                      | 0.7543 | 0.4520 | 0.4709                 | -17.003 | -2.371 | -1.003        | 1.9251    | 0.74  |
| 5.    | O16  | O                      | 0.5785 | 0.6701 | 0.4393                 | -17.129 | -0.587 | 0.934         | 1.9314    | 0.74  |
| 6.    | O11  | O                      | 0.5000 | 0.5000 | 0.5000                 | -15.741 | -0.062 | -1.259        | 2.3252    | 0.89  |
| 7.    | H48  | H                      | 0.5980 | 0.4350 | 0.2610                 | -12.631 | -2.289 | 1.156         | 3.2571    | 16.29 |
| 8.    | W6   | W                      | 0.6669 | 0.4197 | 0.5676                 | -17.319 | -1.236 | -2.512        | 3.2861    | 1.93  |
| 9.    | W4   | W                      | 0.5546 | 0.3083 | 0.4720                 | -14.026 | -1.130 | -2.421        | 3.2902    | 1.94  |
| 10.   | W4   | W                      | 0.4454 | 0.6917 | 0.5280                 | -17.455 | 1.006  | -0.097        | 3.2939    | 1.94  |
| 11.   | W6   | W                      | 0.3331 | 0.5803 | 0.4324                 | -14.162 | 1.112  | -0.005        | 3.3012    | 1.94  |
| 12.   | H55  | H                      | 0.5760 | 0.6260 | 0.2250                 | -13.722 | -1.827 | 3.107         | 3.4420    | 17.21 |
| 13.   | H1   | H                      | 0.8440 | 0.6810 | 0.3450                 | -18.125 | -3.188 | 2.453         | 3.5039    | 17.52 |
| 14.   | O14  | O                      | 0.4108 | 0.4118 | 0.4225                 | -13.104 | 0.014  | -1.165        | 3.5083    | 1.35  |
| 15.   | O15  | O                      | 0.6768 | 0.2818 | 0.5321                 | -15.628 | -1.851 | -3.201        | 3.5193    | 1.35  |
| 16.   | O15  | O                      | 0.3232 | 0.7182 | 0.4679                 | -15.853 | 1.727  | 0.683         | 3.5210    | 1.35  |
| 17.   | O14  | O                      | 0.5892 | 0.5882 | 0.5775                 | -18.377 | -0.138 | -1.352        | 3.5262    | 1.36  |
| 18.   | H27  | H                      | 1.0260 | 0.3840 | 0.3880                 | -17.475 | -5.158 | -0.253        | 3.8485    | 19.24 |
| 19.   | H13  | H                      | 0.6360 | 0.8370 | 0.3300                 | -17.638 | -1.214 | 3.651         | 3.8798    | 19.40 |
| 20.   | H49  | H                      | 0.7350 | 0.3470 | 0.2260                 | -12.465 | -3.793 | 1.018         | 3.9072    | 19.54 |
| 21.   | H35  | H                      | 0.9410 | 0.2010 | 0.3680                 | -14.792 | -5.045 | -1.604        | 3.9094    | 19.55 |
| 22.   | H37  | H                      | 0.7830 | 0.5090 | 0.1799                 | -13.727 | -4.017 | 2.936         | 3.9909    | 19.95 |
| 23.   | C22  | C                      | 0.6401 | 0.3784 | 0.2262                 | -11.971 | -2.954 | 1.158         | 4.0343    | 6.96  |
| 24.   | H18  | H                      | 0.3930 | 0.8760 | 0.3730                 | -16.579 | 1.057  | 3.171         | 4.1071    | 20.54 |
| 25.   | H6   | H                      | 0.9570 | 0.5680 | 0.2390                 | -16.541 | -4.943 | 2.922         | 4.1821    | 20.91 |
| 26.   | H20  | H                      | 0.7030 | 0.8030 | 0.4460                 | -19.490 | -1.213 | 2.082         | 4.1869    | 20.93 |
| 27.   | H43  | H                      | 0.9700 | 0.3750 | 0.2160                 | -14.537 | -5.654 | 1.642         | 4.2731    | 21.37 |
| 28.   | H60  | H                      | 0.3480 | 0.7850 | 0.2760                 | -14.013 | 0.668  | 3.526         | 4.3843    | 21.92 |
| 29.   | C25  | C                      | 0.5492 | 0.6498 | 0.1776                 | -13.061 | -1.807 | 3.830         | 4.4159    | 7.61  |
| 30.   | C1   | C                      | 0.8940 | 0.7263 | 0.3264                 | -18.702 | -3.573 | 3.100         | 4.4492    | 7.67  |
| 31.   | H34  | H                      | 0.9400 | 0.1450 | 0.4518                 | -15.428 | -4.728 | -3.051        | 4.4911    | 22.46 |
| 32.   | H21  | H                      | 0.9050 | 0.6450 | 0.4680                 | -20.006 | -3.107 | 0.778         | 4.4977    | 22.49 |
| 33.   | O19  | O                      | 0.5125 | 0.4175 | 0.6379                 | -16.994 | 0.370  | -3.545        | 4.5918    | 1.77  |
| 34.   | O17  | O                      | 0.2457 | 0.5480 | 0.5291                 | -14.479 | 2.247  | -1.514        | 4.5918    | 1.77  |
| 35.   | O16  | O                      | 0.4215 | 0.3299 | 0.5607                 | -14.352 | 0.463  | -3.451        | 4.5943    | 1.77  |
| 36.   | O13  | O                      | 0.3350 | 0.6373 | 0.6064                 | -17.123 | 2.172  | -1.597        | 4.5983    | 1.77  |
| 37.   | C16  | C                      | 0.9914 | 0.1390 | 0.4038                 | -15.132 | -5.412 | -2.471        | 4.6233    | 7.97  |
| 38.   | H51  | H                      | 0.6360 | 0.2260 | 0.2890                 | -11.394 | -2.968 | -0.828        | 4.6452    | 23.23 |
| 39.   | W5   | W                      | 0.3494 | 0.4796 | 0.6041                 | -15.746 | 1.649  | -2.834        | 4.6504    | 2.74  |
| 40.   | O18  | O                      | 0.7876 | 0.3624 | 0.6180                 | -18.490 | -2.074 | -3.431        | 4.6606    | 1.79  |
| 41.   | O18  | O                      | 0.2124 | 0.6376 | 0.3820                 | -12.991 | 1.950  | 0.914         | 4.6629    | 1.79  |
| 42.   | O12  | O                      | 0.4079 | 0.8319 | 0.5490                 | -18.739 | 1.770  | 0.748         | 4.6652    | 1.79  |
| 43.   | O12  | O                      | 0.5921 | 0.1681 | 0.4510                 | -12.742 | -1.894 | -3.266        | 4.6695    | 1.80  |
| 44.   | C12  | C                      | 1.1054 | 0.3900 | 0.3879                 | -18.189 | -5.778 | -0.109        | 4.7163    | 8.13  |
| 45.   | H25  | H                      | 1.0800 | 0.4670 | 0.4020                 | -18.889 | -5.306 | 0.320         | 4.7361    | 23.68 |
| 46.   | C6   | C                      | 0.6094 | 0.9182 | 0.3246                 | -18.096 | -0.826 | 4.343         | 4.7627    | 8.21  |
| 47.   | H4   | H                      | 0.8360 | 0.7620 | 0.2250                 | -17.143 | -3.563 | 4.521         | 4.7819    | 23.91 |
| 48.   | H23  | H                      | 0.7240 | 0.7030 | 0.5710                 | -20.472 | -0.962 | -0.184        | 4.8317    | 24.16 |
| 49.   | H56  | H                      | 0.5770 | 0.7120 | 0.1540                 | -13.542 | -1.999 | 4.647         | 4.8595    | 24.30 |
| 50.   | H2   | H                      | 0.9830 | 0.6790 | 0.3340                 | -19.107 | -4.363 | 2.731         | 4.8903    | 24.45 |
| 51.   | H15  | H                      | 0.5080 | 0.9420 | 0.4300                 | -18.939 | 0.609  | 3.170         | 4.9069    | 24.53 |
| 52.   | C17  | C                      | 0.7797 | 0.5250 | 0.1279                 | -13.127 | -4.229 | 3.676         | 4.9118    | 8.47  |
| 53.   | C23  | C                      | 0.6084 | 0.2689 | 0.2454                 | -10.958 | -2.873 | 0.004         | 4.9121    | 8.47  |
| 54.   | C9   | C                      | 0.7766 | 0.8200 | 0.4434                 | -20.223 | -1.773 | 2.338         | 4.9224    | 8.49  |
| 55.   | H57  | H                      | 0.3740 | 0.6250 | 0.2140                 | -11.882 | -0.274 | 2.990         | 4.9234    | 24.62 |
| 56.   | H36  | H                      | 1.0700 | 0.1490 | 0.4000                 | -15.825 | -6.035 | -2.252        | 4.9771    | 24.89 |

Electronic Supplementary Information for Dalton Transactions  
 This journal is © The Royal Society of Chemistry 2006

Bond search from target site: W6:  
 ... Found 55 atoms within 0.00 - 5.00 Å of this site.

|       |      | Fractional Coordinates |        |        | Orthogonal Coordinates |         |        | Bond Distance |           |       |
|-------|------|------------------------|--------|--------|------------------------|---------|--------|---------------|-----------|-------|
| Label | Elmt | x                      | y      | z      | xor[Å]                 | yor[Å]  | zor[Å] | d[Å]          | d/(rA+rB) |       |
| TARG. | W6   | W                      | 0.6669 | 0.4197 | 0.5676                 | -17.319 | -1.236 | -2.512        |           |       |
| 1.    | O18  | O                      | 0.7876 | 0.3624 | 0.6180                 | -18.490 | -2.074 | -3.431        | 1.7079    | 0.66  |
| 2.    | O17  | O                      | 0.7543 | 0.4520 | 0.4709                 | -17.003 | -2.371 | -1.003        | 1.9146    | 0.74  |
| 3.    | O14  | O                      | 0.5892 | 0.5882 | 0.5775                 | -18.377 | -0.138 | -1.352        | 1.9156    | 0.74  |
| 4.    | O15  | O                      | 0.6768 | 0.2818 | 0.5321                 | -15.628 | -1.851 | -3.201        | 1.9267    | 0.74  |
| 5.    | O19  | O                      | 0.5125 | 0.4175 | 0.6379                 | -16.994 | 0.370  | -3.545        | 1.9366    | 0.74  |
| 6.    | O11  | O                      | 0.5000 | 0.5000 | 0.5000                 | -15.741 | -0.062 | -1.259        | 2.3327    | 0.90  |
| 7.    | W5   | W                      | 0.6506 | 0.5204 | 0.3959                 | -15.735 | -1.773 | 0.316         | 3.2861    | 1.93  |
| 8.    | W4   | W                      | 0.5546 | 0.3083 | 0.4720                 | -14.026 | -1.130 | -2.421        | 3.2962    | 1.94  |
| 9.    | W4   | W                      | 0.4454 | 0.6917 | 0.5280                 | -17.455 | 1.006  | -0.097        | 3.2985    | 1.94  |
| 10.   | W5   | W                      | 0.3494 | 0.4796 | 0.6041                 | -15.746 | 1.649  | -2.834        | 3.3012    | 1.94  |
| 11.   | O16  | O                      | 0.5785 | 0.6701 | 0.4393                 | -17.129 | -0.587 | 0.934         | 3.5120    | 1.35  |
| 12.   | O13  | O                      | 0.6650 | 0.3627 | 0.3936                 | -14.358 | -2.296 | -0.920        | 3.5251    | 1.36  |
| 13.   | O13  | O                      | 0.3350 | 0.6373 | 0.6064                 | -17.123 | 2.172  | -1.597        | 3.5338    | 1.36  |
| 14.   | O16  | O                      | 0.4215 | 0.3299 | 0.5607                 | -14.352 | 0.463  | -3.451        | 3.5460    | 1.36  |
| 15.   | H60  | H                      | 0.6520 | 0.2150 | 0.7240                 | -17.468 | -0.792 | -6.043        | 3.5614    | 17.81 |
| 16.   | H29  | H                      | 0.9880 | 0.1870 | 0.6240                 | -18.609 | -4.084 | -4.689        | 3.8097    | 19.05 |
| 17.   | H22  | H                      | 1.0510 | 0.2610 | 0.5180                 | -18.347 | -4.970 | -2.760        | 3.8805    | 19.40 |
| 18.   | H52  | H                      | 0.5890 | 0.6420 | 0.7080                 | -20.688 | 0.698  | -2.459        | 3.8845    | 19.42 |
| 19.   | H48  | H                      | 0.4020 | 0.5650 | 0.7390                 | -18.850 | 2.165  | -3.673        | 3.9065    | 19.53 |
| 20.   | H23  | H                      | 0.7240 | 0.7030 | 0.5710                 | -20.472 | -0.962 | -0.184        | 3.9293    | 19.65 |
| 21.   | H18  | H                      | 0.6070 | 0.1240 | 0.6270                 | -14.902 | -1.181 | -5.688        | 3.9917    | 19.96 |
| 22.   | H25  | H                      | 0.9200 | 0.5330 | 0.5980                 | -20.896 | -2.811 | -1.652        | 4.0020    | 20.01 |
| 23.   | H34  | H                      | 0.9400 | 0.1450 | 0.4518                 | -15.428 | -4.728 | -3.051        | 4.0079    | 20.04 |
| 24.   | H57  | H                      | 0.6260 | 0.3750 | 0.7860                 | -19.599 | 0.149  | -5.507        | 4.0108    | 20.05 |
| 25.   | H33  | H                      | 0.9150 | 0.0430 | 0.5910                 | -16.207 | -4.039 | -5.556        | 4.2841    | 21.42 |
| 26.   | H55  | H                      | 0.4240 | 0.3740 | 0.7750                 | -17.760 | 1.703  | -5.625        | 4.3030    | 21.52 |
| 27.   | C27  | C                      | 0.6794 | 0.1984 | 0.7716                 | -18.202 | -0.798 | -6.708        | 4.3102    | 7.43  |
| 28.   | H59  | H                      | 0.7690 | 0.1910 | 0.7670                 | -18.814 | -1.557 | -6.608        | 4.3715    | 21.86 |
| 29.   | H9   | H                      | 0.8430 | 0.4180 | 0.7450                 | -21.231 | -1.697 | -4.416        | 4.3745    | 21.87 |
| 30.   | H2   | H                      | 1.0170 | 0.3210 | 0.6660                 | -20.677 | -3.754 | -4.063        | 4.4749    | 22.37 |
| 31.   | H21  | H                      | 1.0950 | 0.3550 | 0.5320                 | -19.779 | -5.010 | -2.110        | 4.5234    | 22.62 |
| 32.   | H27  | H                      | 1.0260 | 0.3840 | 0.3880                 | -17.475 | -5.158 | -0.253        | 4.5288    | 22.64 |
| 33.   | C26  | C                      | 0.5982 | 0.3133 | 0.8118                 | -19.154 | 0.355  | -6.347        | 4.5385    | 7.82  |
| 34.   | O19  | O                      | 0.4875 | 0.5825 | 0.3621                 | -14.487 | -0.494 | 1.028         | 4.5938    | 1.77  |
| 35.   | O15  | O                      | 0.3232 | 0.7182 | 0.4679                 | -15.853 | 1.727  | 0.683         | 4.5979    | 1.77  |
| 36.   | O14  | O                      | 0.4108 | 0.4118 | 0.4225                 | -13.104 | 0.014  | -1.165        | 4.5981    | 1.77  |
| 37.   | C12  | C                      | 0.8946 | 0.6100 | 0.6121                 | -21.596 | -2.339 | -1.223        | 4.6012    | 7.93  |
| 38.   | O17  | O                      | 0.2457 | 0.5480 | 0.5291                 | -14.479 | 2.247  | -1.514        | 4.6038    | 1.77  |
| 39.   | H21  | H                      | 0.9050 | 0.6450 | 0.4680                 | -20.006 | -3.107 | 0.778         | 4.6414    | 23.21 |
| 40.   | C11  | C                      | 0.8044 | 0.7132 | 0.5670                 | -21.179 | -1.601 | 0.042         | 4.6428    | 8.00  |
| 41.   | O12  | O                      | 0.4079 | 0.8319 | 0.5490                 | -18.739 | 1.770  | 0.748         | 4.6570    | 1.79  |
| 42.   | H35  | H                      | 0.9410 | 0.2010 | 0.3680                 | -14.792 | -5.045 | -1.604        | 4.6603    | 23.30 |
| 43.   | O20  | O                      | 0.2405 | 0.4632 | 0.6820                 | -15.772 | 2.895  | -4.018        | 4.6608    | 1.79  |
| 44.   | C10  | C                      | 1.1267 | 0.2791 | 0.5127                 | -19.070 | -5.558 | -2.460        | 4.6632    | 8.04  |
| 45.   | W6   | W                      | 0.3331 | 0.5803 | 0.4324                 | -14.162 | 1.112  | -0.005        | 4.6654    | 2.74  |
| 46.   | O20  | O                      | 0.7595 | 0.5368 | 0.3180                 | -15.709 | -3.019 | 1.501         | 4.6772    | 1.80  |
| 47.   | O12  | O                      | 0.5921 | 0.1681 | 0.4510                 | -12.742 | -1.894 | -3.266        | 4.6852    | 1.80  |
| 48.   | H26  | H                      | 0.8470 | 0.6150 | 0.6634                 | -21.960 | -1.671 | -1.845        | 4.7085    | 23.54 |
| 49.   | C16  | C                      | 0.9914 | 0.1390 | 0.4038                 | -15.132 | -5.412 | -2.471        | 4.7137    | 8.13  |
| 50.   | C13  | C                      | 1.0550 | 0.1193 | 0.6446                 | -18.823 | -4.679 | -5.404        | 4.7411    | 8.17  |
| 51.   | C22  | C                      | 0.3599 | 0.6216 | 0.7738                 | -19.510 | 2.830  | -3.675        | 4.7634    | 8.21  |
| 52.   | C24  | C                      | 0.5380 | 0.7003 | 0.7437                 | -21.301 | 1.443  | -2.469        | 4.7998    | 8.28  |
| 53.   | C8   | C                      | 0.6321 | 0.0367 | 0.6285                 | -14.320 | -1.593 | -6.386        | 4.9113    | 8.47  |
| 54.   | C25  | C                      | 0.4508 | 0.3502 | 0.8224                 | -18.420 | 1.683  | -6.347        | 4.9437    | 8.52  |
| 55.   | H51  | H                      | 0.3640 | 0.7740 | 0.7110                 | -20.087 | 2.844  | -1.689        | 4.9980    | 24.99 |

## References

1. J. Fuchs, W. Freiwald and H. Hartl, *Acta Cryst.*, 1978, **B34**, 1764-1770.
2. G. Henning and A. Huellen, *Z. Kristallogr., Kristallgeometrie, Kristallphys., Kristallchem.*, 1969, **130**, 162-172.
3. T. Ozeki, K. Kusaka, N. Honma, Y. Nakamura, S. Nakamura, S. Oike, N. Yasuda, H. Imura, H. Uekusa, M. Isshiki, C. Katayama and Y. Ohashi, *Chem. Lett.*, 2001, 804-805.
4. A. I. Yanovskii, S. I. Kucheiko and Y. T. Struchkov, *Koord. Khim., Engl. Trans.*, 1987, **13**, 694-697.
